# Supplementary material for: Normothermic Regional Perfusion Experience of Organ Procurement Organizations in the US
Source: PubMed Central journal article supplement (PMC11581661; doi:10.1001/jamanetworkopen.2024.40130), 2024-10-24
Supplement: jamanetwopen-e2440130-s002.pdf [file jamanetwopen-e2440130-s002.pdf]

## Data Sharing Statement

Sellers. Normothermic Regional Perfusion Experience of Organ Procurement Organizations in the US. *JAMA Netw Open*. Published October 22, 2024.

doi:10.1001/jamanetworkopen.2024.40130

### Data

**Data available:** No

### Additional Information

**Explanation for why data not available:** Aggregate, deidentified data will be made available upon reasonable request to Roxane L. Cauwels or Marty T. Sellers.
